# Supplementary material
Source: publisher site journal article supplement (https://www.dovepress.com/article/supplementary_file/576494/576494%20Supplementary%20Appendix.docx)
Supplement: Supplementary file 1 [file 576494%20Supplementary%20Appendix.docx]

Supplementary file

Supplementary Appendix 1 The initial scale of the WPBS (22 items)

| Items |
| --- |
| 1.I am willing to help others actively. |
| 2. I will help my family at any cost. |
| 3. I prefer to help people I know compared with helping strangers |
| 4. I will help others according to my personal ability. |
| 5. I am willing to help the people who really need to be helped, such as the older adults, vulnerable population, people with diseases, disabled person.etc. |
| 6. Empathy makes me help others voluntarily. |
| 7. I don't want to help people who are able to work but idle. |
| 8. I help others without anything in return. |
| 9. I will help my descendants financially or in time |
| 10. I will try my best to help my good friends. |
| 11. I will actively safeguard national interests. |
| 12. It is my duty and obligation to take care of my husband/wife |
| 13. When friends encounter difficulties, I will help them actively. |
| 14. I will help my brothers and sisters who in trouble. |
| 15. When strangers actively seek help from me, I will not refuse them. |
| 16. Helping my family makes me happy and well-being. |
| 17. When helping good friends, I will also consider their acceptance. |
| 18. I will actively maintain social harmony. |
| 19. I prefer to help others financially. |
| 20. I actively contribute to the streets, communities, and neighborhoods by doing what I can doing. |
| 21. I am willing to help others through volunteer activities. |
| 22. I will actively abide by public order. |

Supplementary Appendix 2 The final scale of the WPBS (14 items)

| Subdimensions | Items |
| --- | --- |
| Collectivity | 11. I will actively safeguard national interests. |
|  | 18. I will actively maintain social harmony. |
|  | 22. I will actively abide by public order. |
| Relationship | 10. I will try my best to help my good friends. |
|  | 13. When friends encounter difficulties, I will help them actively. |
|  | 14. I will help my brothers and sisters who in trouble. |
| Altruism | 19. I prefer to help others financially. |
|  | 20. I actively contribute to the streets, communities, and neighborhoods by doing what I can doing. |
|  | 21. I am willing to help others through volunteer activities. |
| Tendency | 1. I am willing to help others actively. |
|  | 2. I will help my family at any cost. |
|  | 3. I prefer to help people I know compared with helping strangers |
|  | 4. I will help others according to my personal ability. |
|  | 5. I am willing to help the people who really need to be helped, such as the older adults, vulnerable population, people with diseases, disabled person.etc. |
